# Supplementary material for: Modulation of defence and iron homeostasis genes in rice roots by the diazotrophic endophyte Herbaspirillum seropedicae
Source: PubMed Central journal article supplement (PMC6646362; doi:10.1038/s41598-019-45866-w), 2019-07-22
Supplement: 41598_2019_45866_MOESM1_ESM.pdf [file 41598_2019_45866_MOESM1_ESM.pdf]

## Supplementary information

### **Modulation of defence and iron homeostasis genes in rice roots by the diazotrophic endophyte *Herbaspirillum seropedicae***

Liziane Cristina Campos Brusamarello-Santos<sup>1,3</sup>, Dayane Alberton<sup>2</sup>, Glaucio Valdameri<sup>2</sup>, Doumit Camilios-Neto<sup>1,6</sup>, Rafael Covre<sup>3</sup>, Katia de Paiva Lopes<sup>3,7</sup>, Michelle Zibetti Tadra-Sfeir<sup>1</sup>, Helisson Faoro<sup>1,8</sup>, Rose Adele Monteiro<sup>1</sup>, Adriano Barbosa-Silva<sup>3,9</sup>, William John Broughton<sup>4</sup>, Fabio Oliveira Pedrosa<sup>1</sup>, Roseli Wassem<sup>5</sup>, Emanuel Maltempi de Souza<sup>1\*</sup>

<sup>1</sup>Department of Biochemistry and Molecular Biology, Federal University of Parana, Curitiba, PR, Brazil

<sup>2</sup>Department of Clinical Analysis, Federal University of Parana, Curitiba, PR, Brazil

<sup>3</sup>Sector of Professional and Technological Education, Federal University of Parana, Curitiba, PR, Brazil

<sup>4</sup>Federal Institute of Materials Research and Testing, Division 4 Environment, Berlin, Germany

<sup>5</sup>Department of Genetic, Federal University of Parana, Curitiba, PR, Brazil

<sup>6</sup>Present address: Department of Biochemistry and Biotechnology, State University of Londrina, Londrina, PR, Brazil

<sup>7</sup>Present address: Department of Neuroscience, Icahn School of Medicine at Mount Sinai, New York, United States

<sup>8</sup>Present address: Carlos Chagas Institut – Fiocruz, Curitiba, PR, Brasil

<sup>9</sup>Present address: Luxembourg Centre for Systems Biomedicine (LCSB), University of Luxembourg, Esch-sur-Alzette, Luxembourg.

\* Correspondence and requests for materials should be addressed to Emanuel Maltempi de Souza (E-mail address: souzaem@ufpr.br)

## Supplementary material

Supplementary material 1: Command line used for SAET software

```
$ /home/liziane/saet_mp/ home/liziane/cr3a.csfasta /home/liziane/cr3a.qual 382788128 -fixdir  
/home/liziane/cr3a_fixdir
```

Supplementary material 2: Script used for heat map construction.

```
# Heatmaps for rice dataset  
library(edgeR)  
require(gplots)  
require(Hmisc)  
library(RColorBrewer)  
library(ComplexHeatmap)  
  
setwd("/Users/Liziane/Documents/2019/revisão-artigo-arroz/heatmap/katia")  
counts_table = read.table("input_DESeq_3dias_cob2.txt", header = T, row.names = 1)  
dim(counts_table) #13840 7  
deg_genes = read.table("LOCs_rice.txt", header = T)  
dim(deg_genes) #1014 Differentially Expressed genes  
  
###Remove genes with no expression  
counts_table_nzero = counts_table[rowSums(counts_table)!=0,]  
dim(counts_table_nzero) #13840 7  
cpm_rice = cpm(counts_table_nzero)  
  
###Heatmaps###  
#Spearman  
cormatrix = rcorr(as.matrix(cpm_rice), type='spearman')  
corrdata = as.matrix(cormatrix$r)  
  
pdf(file = "CPM_Spearman.pdf",width = 16,height = 12, fonts = "sans",pointsize = 16)  
heatmap.2(corrdata, main="CPM - SPEARMAN",trace="none", col =  
c(sort(brewer.pal(9,"Blues")),brewer.pal(9,"Reds")), margins = c(15,15))
```

```
dev.off()
```

```
#Pearson
```

```
cormatrix = rcorr(as.matrix(cpm_rice), type='pearson')
```

```
corrdata = as.matrix(cormatrix$r)
```

```
pdf(file = "CPM_Pearson.pdf",width = 16,height = 12, fonts = "sans",pointsize = 16)
```

```
heatmap.2(corrdata, main="CPM - PEARSON",trace="none", col =
```

```
c(sort(brewer.pal(9,"Blues")),brewer.pal(9,"Reds")), margins = c(15,15))
```

```
dev.off()
```

```
#By DE gene list
```

```
deg_genes_exp = cpm_rice[which(rownames(cpm_rice)%in%deg_genes$genes),]
```

```
pdf(file = "CPM_genesDE.pdf",width = 6,height = 8, fonts = "sans",pointsize = 16)
```

```
Heatmap(log10(deg_genes_exp+1),
```

```
  show_row_names = FALSE,
```

```
  name = "log10(CPM+1)",
```

```
  col = c(sort(brewer.pal(9,"Blues")),brewer.pal(9,"Reds")))
```

```
dev.off()
```

```
png(("CPM_genesDE.png"),width = 6,height = 8, res = 300, units = "in")
```

```
Heatmap(log10(deg_genes_exp+1),
```

```
  show_row_names = FALSE,
```

```
  name = "log10(CPM+1)",
```

```
  col = c(sort(brewer.pal(9,"Blues")),brewer.pal(9,"Reds")))
```

```
dev.off()
```

**Supplementary Figure**

Supplementary Fig.1 Colony-forming units of *H. seropedicae* colonizing rice roots epiphytically (red line) and endophytically (blue line) 1, 3 and 7 days after inoculation (DAI). The results are average of at least 5 independent replicates.

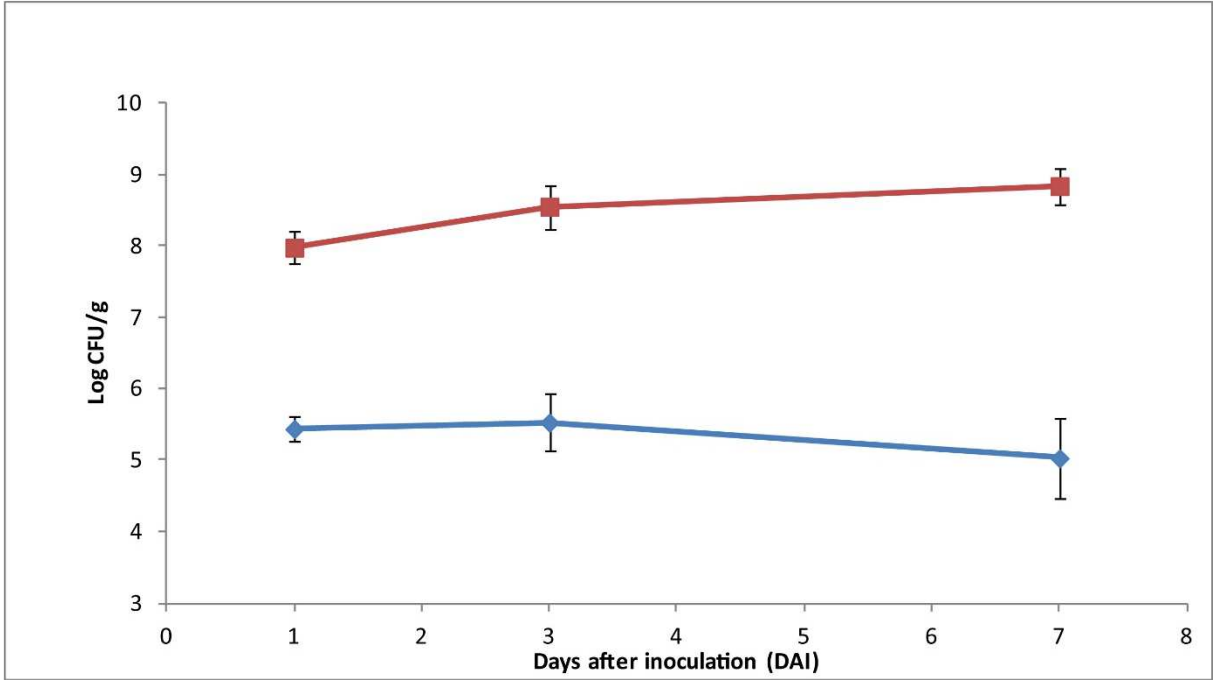

Supplementary Fig.2. Diagram showing how rice roots were grown, inoculated with *H. seropedicae*, prepared for extraction of RNA and the RNA-seq analyses performed.

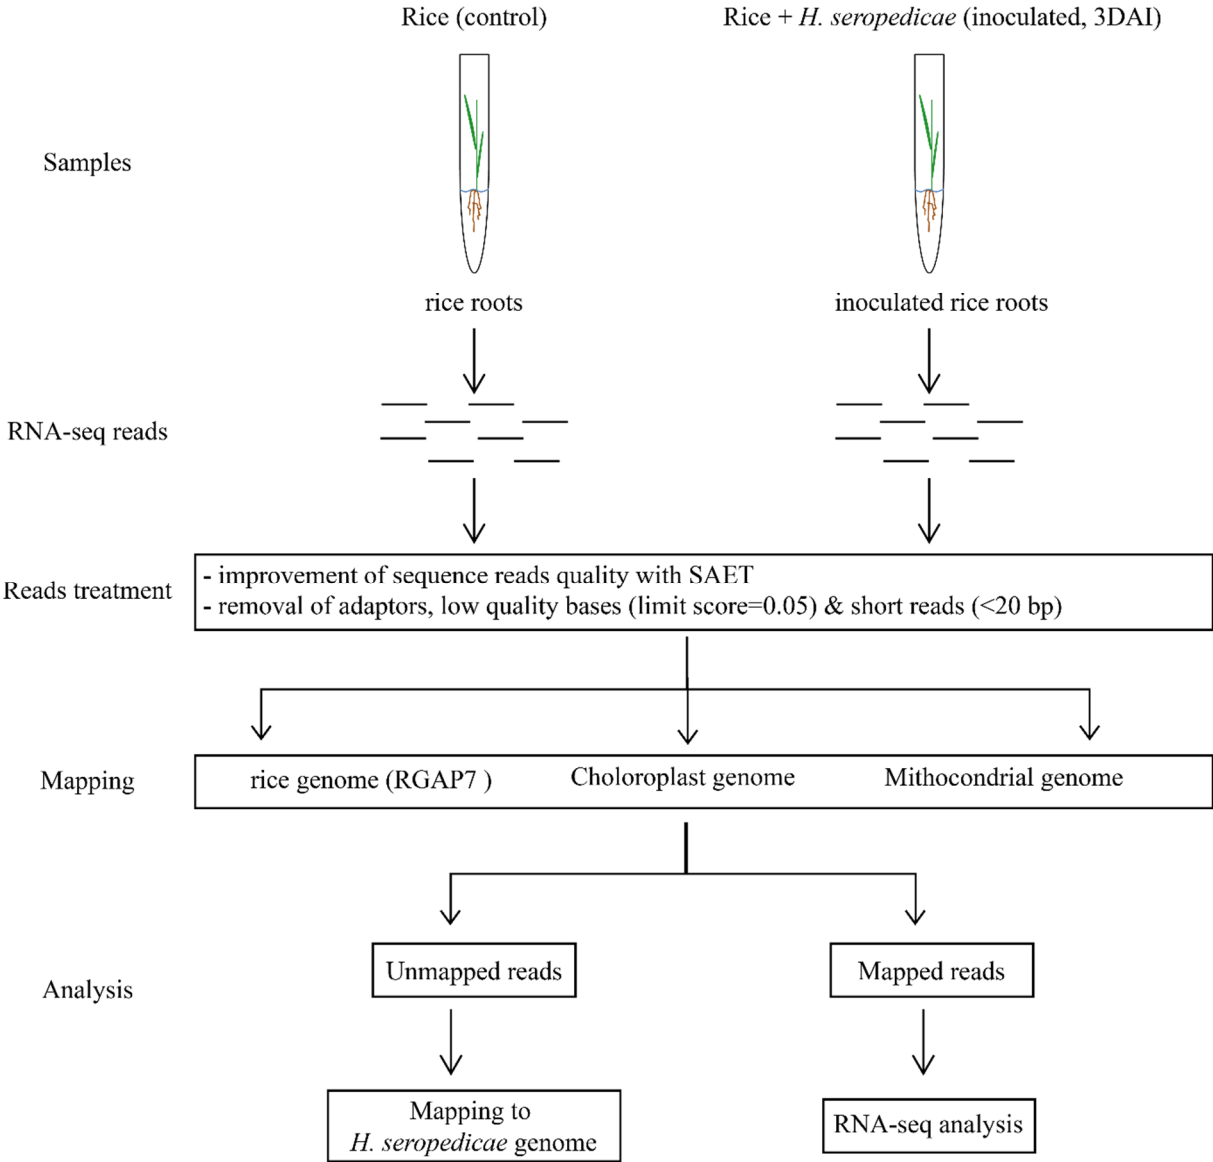

Supplementary Fig.3. Heat map showing the expression profiles of rice roots colonised by *H. seropedicae* and controls. Only the differentially expressed genes (p-value <0.05, fold change > 2, n=255) were used and the data were normalized by CPM (counts per million). Dark blue colors represents lower expression, and dark-red colour corresponds to high expression, in a log<sub>10</sub> scale. CR3a and CR3b are independently biological replicate libraries from non-colonised roots (controls) and IR3a and IR3b are biological replicate libraries from colonised roots. Run 1 and Run 2 are technical sequencing runs of the libraries.

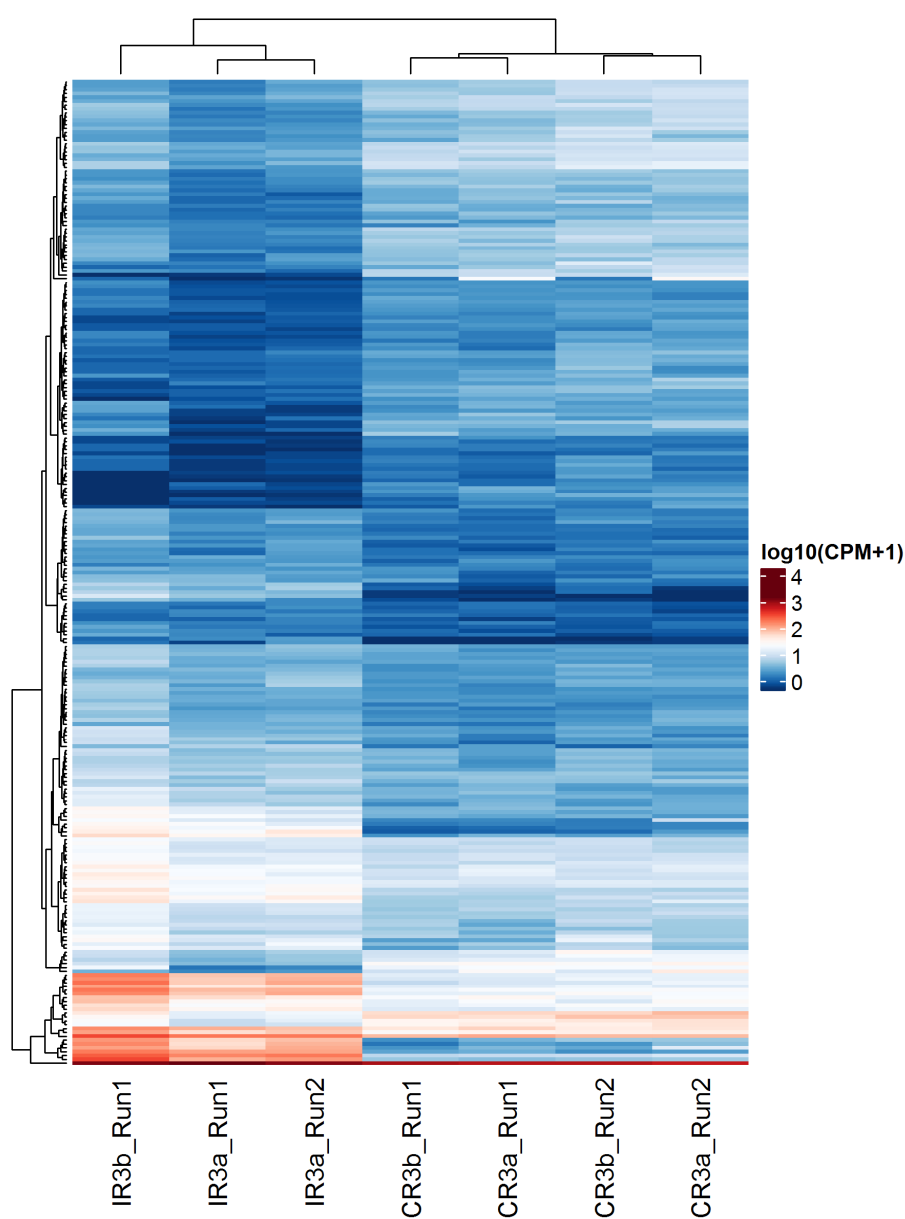

## Supplementary Tables

Supplementary Table 1 – Statistics of RNA-seq reads mapping

|                                                                   | <b>Control</b>       | <b>Inoculated</b> |
|-------------------------------------------------------------------|----------------------|-------------------|
| <b>Total number of reads</b>                                      | 101,587,721          | 59,591,404        |
| <b>Total number of reads after trimming</b>                       | 65,099,320           | 38,463,798        |
| <b>Reads uniquely mapped to RGAP7 (%)</b>                         | 12,255,809<br>(18.8) | 9,919,863 (25.8)  |
| <b>Reads mapped uniquely to the rice mitochondrial genome (%)</b> | 626,587 (0.96)       | 253,771 (0.66)    |
| <b>Reads mapped uniquely to the rice chloroplast genome (%)</b>   | 102,730 (0.16)       | 36,915 (0.09)     |
| <b>Total number of reads mapped to rice rRNA (%)</b>              | 41,744,369<br>(64.1) | 26,875,340 (69.9) |
| <b>Reads mapped to SmR1 genome (%)</b>                            |                      | 24,263 (0.06)     |
| <b>Total number of reads mapped (%)</b>                           | 54,803,125<br>(84.2) | 32,813,183 (85.3) |
| <b>Unmapped reads (%)</b>                                         | 10,296,195<br>(15.8) | 5,650,615 (14.7)  |

Supplementary Table 4 – Genes involved in secondary metabolism and abiotic and biotic stresses modulated in rice roots colonised with *H. seropedicae*.

| Gene ID                           | Gene product name/ description*                                                                                                             | Fold change | P-value  | P-adj    |
|-----------------------------------|---------------------------------------------------------------------------------------------------------------------------------------------|-------------|----------|----------|
| <b>Isoprenoid synthesis genes</b> |                                                                                                                                             |             |          |          |
|                                   | Transketolase, putative, expressed (MSU)                                                                                                    |             |          |          |
| LOC_Os07g09190.1                  | Similar to 1-deoxy-D-xylulose 5-phosphate synthase 2 precursor (DXS)<br>(RAPDB)                                                             | -5.9        | 1.30E-03 | 0.10     |
| LOC_Os01g01710.1                  | 1-deoxy-D-xylulose 5-phosphate reductoisomerase (DXR), chloroplast precursor, putative, expressed (MSU)                                     | -1.8        | 1.20E-03 | 0.09     |
|                                   | GHMP kinases ATP-binding protein, putative, expressed (MSU)                                                                                 |             |          |          |
| LOC_Os01g58790.2                  | Similar to 4-diphosphocytidyl-2-C-methyl-D-erythritol kinase (CMK),<br>chloroplast precursor (RAPDB)                                        | -1.5        | 0.03     | 0.59     |
| LOC_Os02g39160.1                  | Hydroxymethylbutenyl 4-diphosphate synthase (HDS), putative, expressed (MSU)<br><br>Similar to Isoprenoid biosynthesis-like protein (RAPDB) | -1.3        | 0.04     | 0.64     |
|                                   | 4-hydroxy-3-methylbut-2-enyl diphosphate reductase (HDR), putative, expressed (MSU)                                                         |             |          |          |
| LOC_Os03g52170.1                  | Similar to Isopentenyl/dimethylallyl diphosphate synthase (RAPDB)                                                                           | -1.5        | 0.04     | 0.65     |
| LOC_Os07g39270.1                  | Polyprenyl synthetase, putative, expressed (MSU)                                                                                            | -2.6        | 6.70E-06 | 1.30E-03 |



|                  |                                                    |      |          |      |
|------------------|----------------------------------------------------|------|----------|------|
|                  | Similar to GGDP synthase (DGPS) (RAPDB)            |      |          |      |
|                  | Terpene synthase, putative, expressed (MSU)        |      |          |      |
| LOC_Os11g28530.2 | Similar to Stemar-13-ene synthase (OsDTC2) (RAPDB) | -1.9 | 1.50E-03 | 0.11 |

#### Isoflavonoid synthesis genes

|                  |                                                                               |      |          |          |
|------------------|-------------------------------------------------------------------------------|------|----------|----------|
| LOC_Os12g02370.2 | Chalcone-flavonone isomerase (CHI), putative, expressed (MSU)                 | -2.2 | 1.00E-04 | 0.01     |
| LOC_Os06g44180.1 | NAD dependent epimerase/dehydratase family protein, putative, expressed (MSU) | -2.5 | 0.04     | 0.63     |
|                  | Similar to NADPH HC toxin reductase (RAPDB)                                   |      |          |          |
| LOC_Os03g03034.1 | Flavonol synthase (FS)/flavanone 3-hydroxylase, putative, expressed (MSU)     | -8.3 | 3.60E-07 | 1.00E-04 |
|                  | Expressed protein (MSU)                                                       |      |          |          |
| LOC_Os12g16280.1 | Similar to Isoflavone reductase-like protein 1.(RAPDB)                        | -1.3 | 0.01     | 0.31     |

#### Lignin synthesis genes

|                  |                                            |      |          |          |
|------------------|--------------------------------------------|------|----------|----------|
| LOC_Os02g56700.1 | Dehydrogenase, putative, expressed (MSU)   | 2.76 | 8.10E-06 | 1.60E-03 |
|                  | Similar to Cinnamoyl-CoA reductase (RAPDB) |      |          |          |

#### Secondary metabolism genes

|                  |                                                       |       |          |          |
|------------------|-------------------------------------------------------|-------|----------|----------|
| LOC_Os01g63190.1 | Laccase precursor protein, putative, expressed (MSU)  | 1.56  | 0.02     | 0.46     |
| LOC_Os04g27070.1 | Terpene synthase, putative, expressed (MSU)           | -7.1  | 1.00E-09 | 4.00E-07 |
| LOC_Os04g51660.1 | Transferase family protein, putative, expressed (MSU) | -12.8 | 2.80E-03 | 0.16     |

|                  |                                                                                                        |      |          |          |
|------------------|--------------------------------------------------------------------------------------------------------|------|----------|----------|
| LOC_Os08g14760.1 | AMP-binding domain containing protein, expressed (MSU)<br>Similar to 4-coumarate--CoA ligase 1 (RAPDB) | 1.48 | 0.03     | 0.57     |
| LOC_Os09g31490.1 | Reductase, putative, expressed (MSU)<br>NAD(P)-binding domain containing protein (RAPDB)               | 1.60 | 0.01     | 0.38     |
| LOC_Os11g18366.2 | Cycloartenol synthase, putative, expressed (MSU)                                                       | -2.7 | 1.00E-07 | 3.00E-05 |

### Cell wall

|                  |                                                                                                        |      |          |      |
|------------------|--------------------------------------------------------------------------------------------------------|------|----------|------|
| LOC_Os01g16770.1 | Similar to Expansin-A11 (MSU)                                                                          | 2.6  | 0.02     | 0.53 |
| LOC_Os04g44840.1 | Glycosyl hydrolase family 3 protein, putative, expressed (MSU)<br>Similar to Beta-D-xylosidase (RAPDB) | 2.0  | 1.35E-03 | 0.10 |
| LOC_Os09g31270.1 | Polygalacturonase, putative, expressed (MSU)                                                           | -2.4 | 6.95E-03 | 0.30 |

### Peroxidases

|                  |                                                 |     |          |          |
|------------------|-------------------------------------------------|-----|----------|----------|
| LOC_Os03g25300.1 | Peroxidase precursor, putative, expressed (MSU) | 2.2 | 5.87E-04 | 0.06     |
| LOC_Os07g01410.1 | Peroxidase precursor, putative, expressed (MSU) | 2.8 | 2.86E-05 | 4.66E-03 |

### Protein degradation

|                  |                                                                                                                                |      |          |          |
|------------------|--------------------------------------------------------------------------------------------------------------------------------|------|----------|----------|
| LOC_Os01g19260.1 | ATPase, putative, expressed (MSU)                                                                                              | 2.1  | 1.94E-03 | 0.13     |
| LOC_Os01g57082.1 | Insulin-degrading enzyme, putative, expressed (MSU)<br>Peptidase M16, zinc-binding site domain containing protein (RAPDB)      | -2.4 | 0.04     | 0.61     |
| LOC_Os04g03796.1 | OsSub37 - Putative Subtilisin homologue, expressed (MSU)<br>Peptidase S8, subtilisin-related domain containing protein (RAPDB) | -2.4 | 9.40E-13 | 4.65E-10 |
| LOC_Os04g53620.1 | Ubiquitin family protein, putative, expressed (MSU)                                                                            | 2.8  | 3.33E-16 | 2.00E-13 |

|                   |                                                                                                                                     |      |          |          |
|-------------------|-------------------------------------------------------------------------------------------------------------------------------------|------|----------|----------|
| LOC_Os05g28730.1  | Zinc finger, C3HC4 type domain containing protein,<br>expressed (MSU)                                                               | -2.2 | 0.01     | 0.38     |
|                   | Similar to PIT1 (RAPDB)                                                                                                             |      |          |          |
| LOC_Os05g48340.1  | Proteasome-related, putative, expressed (MSU)<br>Armadillo-type fold domain containing protein<br>(RAPDB)                           | -2.1 | 1.84E-03 | 0.12     |
| LOC_Os06g05990.1  | Zinc finger family protein, putative, expressed (MSU)                                                                               | 2.0  | 3.15E-05 | 4.98E-03 |
| LOC_Os06g06600.1  | OsFBX187 - F-box domain containing protein,<br>expressed (MSU)                                                                      | -2.2 | 5.29E-03 | 0.25     |
| LOC_Os06g29310.1  | ulp1 protease family protein, putative, expressed<br>(MSU)<br>Peptidase C48, SUMO/Sentrin/Ubl1 family protein<br>(RAPDB)            | 2.1  | 0.01     | 0.35     |
| LOC_Os09g39070.1  | Thiol protease SEN102 precursor, putative, expressed<br>(MSU)                                                                       | 2.1  | 2.88E-04 | 0.03     |
| <b>Redox</b>      |                                                                                                                                     |      |          |          |
| LOC_Os01g16152.1  | Peroxiredoxin, putative, expressed (MSU)                                                                                            | -2.1 | 0.01     | 0.43     |
| LOC_Os03g13160.1  | Non-symbiotic hemoglobin 2, putative, expressed<br>(MSU)                                                                            | 2.4  | 9.11E-04 | 0.08     |
| LOC_Os03g12510.1  | Non-symbiotic hemoglobin 2, putative, expressed<br>(MSU)                                                                            | 104  | 5.58E-24 | 5.15E-21 |
| LOC_Os07g44440.1  | Peroxiredoxin, putative, expressed (MSU)                                                                                            | 3.7  | 2.32E-05 | 3.90E-03 |
| <b>Signalling</b> |                                                                                                                                     |      |          |          |
| LOC_Os09g22450.1  | Lipase, putative, expressed (MSU)<br>Lipase, class 3 family protein, gene name synonym:<br>enhanced disease susceptibility 1(RAPDB) | 2.0  | 0.01     | 0.36     |
| LOC_Os02g01520.1  | IQ calmodulin-binding motif family protein, putative,<br>expressed (MSU)                                                            | 2.2  | 0.03     | 0.60     |
| LOC_Os02g30190.1  | expressed protein (MSU)                                                                                                             | 2.0  | 0.04     | 0.64     |

|                                    |                                                                                         |      |          |          |
|------------------------------------|-----------------------------------------------------------------------------------------|------|----------|----------|
|                                    | EF hand family protein, putative, expressed (MSU)                                       |      |          |          |
| LOC_Os03g19720.1                   | Similar to Hypersensitive reaction associated Ca <sup>2+</sup> -binding protein (RAPDB) | 3.1  | 0.03     | 0.60     |
| LOC_Os04g56430.1                   | Cysteine-rich receptor-like protein kinase, putative, expressed (MSU)                   | 3.2  | 7.01E-05 | 0.01     |
| LOC_Os05g47770.1                   | Serine/threonine-protein kinase At1g18390 precursor, putative, expressed (MSU)          | 2.0  | 0.01     | 0.36     |
| LOC_Os07g03790.1                   | Lectin-like receptor kinase 7, putative, expressed (MSU)                                | -2.7 | 0.01     | 0.35     |
| LOC_Os08g10320.1                   | SHR5-receptor-like kinase, putative, expressed (MSU)                                    | -2.5 | 2.33E-05 | 3.90E-03 |
| <b>Abiotic stress</b>              |                                                                                         |      |          |          |
|                                    | Methyltransferase, putative, expressed (MSU)                                            |      |          |          |
| LOC_Os01g67360.1                   | Similar to dehydration-responsive family protein (RAPDB)                                | -2.9 | 1.96E-03 | 0.13     |
|                                    | ulp1 protease family protein, putative, expressed (MSU)                                 |      |          |          |
| LOC_Os06g29310.1                   | Peptidase C48, SUMO/Sentrin/Ubl1 family protein (RAPDB)                                 | 2.1  | 0.01     | 0.35     |
|                                    | Cupin domain containing protein, expressed (MSU)                                        |      |          |          |
| LOC_Os08g08960.1                   | Similar to Germin-like protein precursor (RAPDB)                                        | -2.7 | 3.72E-05 | 0.01     |
|                                    | Cupin domain containing protein, expressed (MSU)                                        |      |          |          |
| LOC_Os08g13440.1                   | Germin-like protein 8-12, Disease resistance (RAPDB)                                    | -5.3 | 2.08E-04 | 0.03     |
| <b>Regulation of transcription</b> |                                                                                         |      |          |          |
| LOC_Os11g02480.2                   | WRKY46, expressed (MSU)                                                                 | -2.3 | 0.05     | 0.68     |
| LOC_Os04g21950.1                   | WRKY51, expressed (MSU)                                                                 | 2.0  | 0.01     | 0.43     |
| LOC_Os03g27090.1                   | MYB family transcription factor, putative, expressed (MSU)                              | 3.6  | 5.93E-04 | 0.06     |

|                   |                                                                     |      |          |      |
|-------------------|---------------------------------------------------------------------|------|----------|------|
|                   | Expressed protein (MSU)                                             |      |          |      |
| LOC_Os07g48570.1  | Similar to Dof3 gene (Fragment) (RAPDB)                             | 2.2  | 4.86E-03 | 0.24 |
| <b>PR-protein</b> |                                                                     |      |          |      |
| LOC_Os02g38392.1  | NBS-LRR disease resistance protein, putative,<br>expressed (MSU)    | -2.7 | 3.28E-04 | 0.04 |
|                   | Dirigent, putative, expressed (MSU)                                 |      |          |      |
| LOC_Os10g25870.1  | Plant disease resistance response protein family<br>protein (RAPDB) | -2.5 | 0.04     | 0.65 |
|                   | Dirigent, putative, expressed (MSU)                                 |      |          |      |
| LOC_Os11g07680.1  | Conserved hypothetical protein (RAPDB)                              | -3.4 | 4.45E-03 | 0.23 |

\* Gene product name/description from the both rice database were used: MSU (Rice Genome Annotation Project) and RAPDB (The Rice Annotation Project).

Supplementary Table 6 – Oligonucleotides used in this research

| Gene Product Name (MSU)                                                                                                                            | Locus name                          | Abbreviations | Sequence                                                            | [nM] of each primer | Efficiency (threshold 0.2) |
|----------------------------------------------------------------------------------------------------------------------------------------------------|-------------------------------------|---------------|---------------------------------------------------------------------|---------------------|----------------------------|
| Actin 1                                                                                                                                            | AK100267                            | Act           | F 5' CAGCCACACTGTCCCCATCTA3'<br>R 5' AGCAAGGTCGAGACGAAGGA3'         | 200                 | 1.892                      |
| Tubulin beta-2 chain (Beta-2 tubulin).                                                                                                             | LOC_Os01g59150                      | Tub           | F 5' GCTGACCACACCTAGCTTTGG3'<br>R 5' AGGGAACCTTAGGCAGCATGT3'        | 200                 | 1.895                      |
| Conserved hypothetical protein                                                                                                                     | LOC_Os06g48970.1                    | Hypot         | F 5' ATGGACTGAAAAGGCTGAGTTGA3'<br>R 5' GCACCCTGATTGGTGGACTT3'       | 200                 | 1.882                      |
| Tubulin/FtsZ domain containing protein, putative, expressed                                                                                        | LOC_Os07g38730.1                    | Tub/FtsZ      | F 5' ATGAGCAGCTTTCTGTGCCT 3'<br>R 5' CGGTACATCAAGCAGCAAGC 3'        | 200                 | 2.01                       |
| Eukaryotic translation initiation factor 3 subunit C, putative, expressed                                                                          | LOC_Os07g03230.2<br>Os07t0124500-01 | Os07g03230    | F 5' GTGCAACAAAGTCGATACCATGAA 3'<br>R 5' ACAAATCAAGTGAGTGGCTTCCA 3' | 400                 | 2.03                       |
| Glutamine synthetase, catalytic domain containing protein, expressed                                                                               | LOC_Os03g12290.1<br>Os03t0223400-01 | GS            | F 5' CAACCTCACCGACCTCGTTAA 3'<br>R 5' CCTTTCACAGTCCTCGCTTTG 3'      | 400                 | 1.94                       |
| Wall-associated receptor kinase-like 22 precursor, putative, Expressed                                                                             | LOC_Os10g07556.1<br>Os10t0162844-00 | WARK22        | F 5' ATCAAGTGAGCAAAGGGAAGT 3'<br>R 5' GCGATGATCAATGGCGTTGT 3'       | 400                 | 1.99                       |
| Integral membrane protein, putative, expressed (MSU); Vacuolar membrane transporter, Fe and Zn translocation between flag leaves and seeds (RAPDB) | LOC_Os09g23300.1<br>Os09t0396900-02 | Int_Memb      | F 5' GCGGAGATCGCGGACATA 3'<br>R 5' TCCCAACTCAAACCTTCATCATGA 3'      | 400                 | 1.81                       |
| Major facilitator superfamily antiporter, putative, expressed (TOM1)                                                                               | LOC_Os11g04020.1<br>Os11g0134900    | Tom1          | F 5' GCCAAGAACGCCAAAATGA 3'<br>R 5' GGCTTGAAGGTCAACGCAAG 3'         | 400                 | 2.09                       |
| Non symbiotic hemoglobin 2                                                                                                                         | LOC_Os03g12510.1<br>Os03t0226200-01 | rHb2          | F 5' GCTCTCGTGGAGGGAAACAA 3'<br>R 5' CTTCATGATGGCCCACGACT 3'        | 400                 | 2.06                       |
| Metal cation transporter, putative, expressed (OsIRT2)                                                                                             | LOC_Os03g46454.1<br>Os03t0667300-00 | OsITR2        | F 5' CACCAAGGCGCAGCTTCT 3'<br>R 5' CGGATCGTGACACGTTCT 3'            | 400                 | 2.07                       |
| Flavonol synthase/flavanone 3-hydroxylase, putative, expressed                                                                                     | LOC_Os03g03034<br>Os03t0122300-01   | Flavo_Synt    | F 5' CCCGCTTACCCTACCT 3'<br>R 5' TCGGATATCGTCCGTACAGT 3'            | 400                 | 1.97                       |
| Iron-phytosiderophore transporter                                                                                                                  | LOC_Os02g43410<br>Os02t0650300-01   | YSL           | F 5' CCACACAGCCCAAGGAGATAA 3'<br>R 5' TGCCTCCCGTGTAGAACCAT 3'       | 400                 | 1.98                       |
| Metal transporter Nramp6, putative, expressed                                                                                                      | LOC_Os07g15460<br>Os07t0258400-03   | Nramp6        | F 5' GAAAGGAGCCAGCATGGAAA 3'<br>R 5' ATTTGTGATTGGCACCAGCTT 3'       | 400                 | 2.00                       |
| Thionin-like peptide, putative, expressed                                                                                                          | LOC_Os07g24830.1<br>Os07g0429700    | Thionin7      | F 5' TGGTCATCTTGAGCCTCACTGT 3'<br>R 5' GGAGCCACCAGCAGCAATAC 3'      | 200                 | 1.90                       |
| Pathogenesis-related Bet v I family protein, putative, expressed (MSU); Similar to Probenazole-inducible protein PBZ1 (RAPDB)                      | LOC_Os12g36840.1<br>Os12t0555100-01 | PBZ1          | F 5' GGCACCGTTGTCATTCTGAA 3'<br>R 5' GTGCCACCACACGTGTCTTG 3'        | 400                 | 1.82                       |
| Conserved hypothetical protein.                                                                                                                    | Os06t0513862-01                     | Thionin1      | F GCTGAGGAATCGGAGGTAGTTG<br>R TTCTCATGGTGTGCACACA                   | 200                 | 1.93                       |
